# Supplementary material
Source: publisher figshare collection journal article supplement (https://sage.figshare.com/ndownloader/files/40903449)
Supplement: Supplementary file 1 [file 40903449]

**Exploring socio-demographic and mental health differences among constructed male victim severity profiles.**

**APPENDICES**

**Appendix A** – Included items in LCA

| **Table A.** Items included in the LCA | |
| --- | --- |
| ***Abbreviation*** | **Item** |
| ***Hands-off sexual victimization*** | |
| Staring | Someone stared at me in a sexual way or looked at my intimate body parts (e.g., breasts, vagina, penis, anus) when I didn’t want it to happen. |
| Comments | Someone made teasing comments of a sexual nature about my body or appearance even though I didn’t want it to happen. |
| Showing sexual material | Someone showed me sexual or obscene materials such as pictures, videos, … directly or over the internet even though I didn’t want to look at them. |
| Calls or texts | Someone made unwelcome sexual or obscene phone calls or texts to me. |
| Voyeurism | Someone watched me, took photos or filmed me when I didn’t want it to happen while I was undressing, nude, or having sex. |
| Distributing images/videos | Someone distributed naked pictures or videos of me directly or over the internet when I didn’t want it to happen. |
| Exhibitionism | Someone showed their intimate body parts (e.g., breasts, vagina, penis, anus) to me in a sexual way and/or masturbated in front of me when I didn’t want to see it. |
| Forced showing | Someone made me show my intimate body parts (e.g., breasts, vagina, penis, anus) (online or face-to-face) when I didn’t want to do it. |
| ***Hands-on sexual victimization*** | |
| Kissing | Someone kissed me against my will. |
| Touching in care | Someone touched my intimate body parts (e.g., breasts, vagina, penis, anus) during care against my will. |
| Fondling/rubbing | Someone fondled or rubbed up against my intimate body parts (e.g., breasts, vagina, penis, anus) against my will. |
| Undressing | Someone removed (some of) my clothes against my will. |
| ***Rape*** | |
| Oral penetration | Someone had oral sex with me or made me give oral sex against my will. |
| Attempt oral penetration | Someone tried, but did not succeed, to have oral sex with me or tried to make me give oral sex against my will. |
| Vaginal/anal penetration | Someone put their penis, finger(s) or object(s) into my vagina or anus against my will. |
| Attempt vag./anal penetr. | Someone tried, but did not succeed, to put their penis, finger(s) or object(s) into my vagina or anus against my will. |
| Forcing to penetrate | Someone made me put my penis, finger(s) or object(s) into their vagina or anus against my will. |
| ***Self-reported consequences linked to sexual victimization*** | |
| Emotional | I had emotional consequences (anger, fear, sadness, shame, guilt,… ). |
| Injuries | I had physical consequences (pain, injuries, bruises, …). |
| Daily activities | I was not able to perform my daily activities anymore (school, job, hobbies, …). |
| Masculinity | I questioned my feelings of being masculine. |
| Self-esteem | My self-esteem decreased. |
| Avoidance | I avoided some places and/or persons. |
| Sexual problems | I experienced sexual problems. |
| Relational problems | I experienced relational problems. |

**Appendix B** – Calculation of sample weights

**Table B.** Sample weights

| **Age group** | **Wave** | **Population N** | **Population proportion** | **Sample**  ***n*** | **Sample proportion** | **Population proportion/ Sample proportion** |
| --- | --- | --- | --- | --- | --- | --- |
| 16-24 year old | 1 | 601 426 | .15 | 187 | .42 | **.37** |
| 2 | 603 407 | .15 | 218 | .35 | **.44** |
| 25-49 years old | 1 | 1 883 527 | .48 | 154 | .34 | **1.39** |
| 2 | 1 882 695 | .48 | 213 | .34 | **1.41** |
| 50-69 years old | 1 | 1 458 421 | .37 | 108 | .24 | **1.54** |
| 2 | 1 468 224 | .37 | 198 | .31 | **1.18** |
| Total wave 1 |  | 3 943 374 | .50 | 449 | .42 | - |
| Total Wave 2 |  | 3 954 326 | .50 | 629 | .58 | - |
| Total |  | 7 897 700 | 1.00 | 1078 | 1.00 | 1.05 |

**Appendix C** – Detailed conditional probabilities

|  | **Table C.** Conditional class probabilities of responding affirmative (*N* = 1,078) | | | | | |
| --- | --- | --- | --- | --- | --- | --- |
|  |  |  | **Male victim severity profiles** | | | |
|  |  | **Items** | **Class 1 -**  **Low severity – low victimization** | **Class 2 -**  **Medium severity hands-off SV** | **Class 3 -**  **Medium severity poly-victimization** | **Class 4 -**  **High severity – poly-victimization** |
|  |  | Estimated class population share | 58.3% | 21.4% | 13.3% | 7.0% |
|  | Hands-off | Staring | .36 | .32 | .64 | .69 |
|  | Comments | .27 | .64 | .50 | .62 |
|  | Showing sexual material | .32 | .21 | .33 | .39 |
|  | Calls or texts | .10 | .12 | .23 | .38 |
|  | Voyeurism | .02 | .06 | .13 | .10 |
|  | Distributing images/videos | .01 | .05 | .06 | .10 |
|  | Exhibitionism | .08 | .05 | .34 | .39 |
|  | Forced showing | .01 | .02 | .19 | .41 |
|  | Hands-on | Kissing | .21 | .19 | .46 | .36 |
|  | Touching in care | .05 | .01 | .34 | .27 |
|  | Fondling/rubbing | .09 | .03 | .52 | .49 |
|  | Undressing | .01 | .02 | .21 | .29 |
|  | Rape | Oral penetration | .00 | .02 | .13 | .26 |
|  | Attempt oral penetration | .00 | .01 | .19 | .27 |
|  | Vaginal/anal penetration | .00 | .01 | .04 | .15 |
|  | Attempt vag./anal penetr. | .00 | .02 | .06 | .14 |
|  | Forcing to penetrate | .00 | .02 | .07 | .14 |
|  | Self-reported consequences | Emotional | .13 | .67 | .70 | .98 |
|  | Injury | .00 | .06 | .04 | .42 |
|  | Daily activities | .00 | .05 | .07 | .54 |
|  | Masculinity | .01 | .30 | .11 | .75 |
|  | Self-esteem | .02 | .59 | .26 | 1.00 |
|  | Avoidance | .09 | .41 | .51 | .83 |
|  | Sexual problems | .00 | .09 | .04 | .80 |
|  | Relational problems | .00 | .20 | .15 | .85 |
